# Supplementary material
Source: publisher figshare collection journal article supplement (https://future-science-group.figshare.com/ndownloader/files/28924827)
Supplement: Supplementary file 1 [file 28924827]

**Supplemental Table 2**

| **NAT (5’-3’)** | **Target** | | **% viability** |
| --- | --- | --- | --- |
| **Doxorubicin (positive control)** | **Non-specific** | | **14 +- 3.1 (B16F10)** |
| **GAGGACAGTG/gtgagtcagt** | **RBD**  **(exon 3/Intron 4)** | **19% +/- 1.2 (A375)**  **15.2 +/- 0.8 (132N1)** | |
| **TGGTTCTTACCCAGCCGCCG** | **BCL-xL** | **14.9 +- 0.9 (B16F10)** | |

**Supplemental Table 2.** Activity of ASO targeting RBD or BCL-xL in B16F10, A375 and 132N1 cells.
